# Supplementary material for: Reconstructive Methodology in the Synthesis of 2-Aminopurine
Source: MDPI journal article supplement (doi:10.3390/molecules29010134), 2023-12-25
Supplement: s1 [file s1]

## Table of contents

|                              |   |
|------------------------------|---|
| 1. Spectra of compounds..... | 2 |
| 2. Crystallography .....     | 8 |

## 1. Spectra of compounds

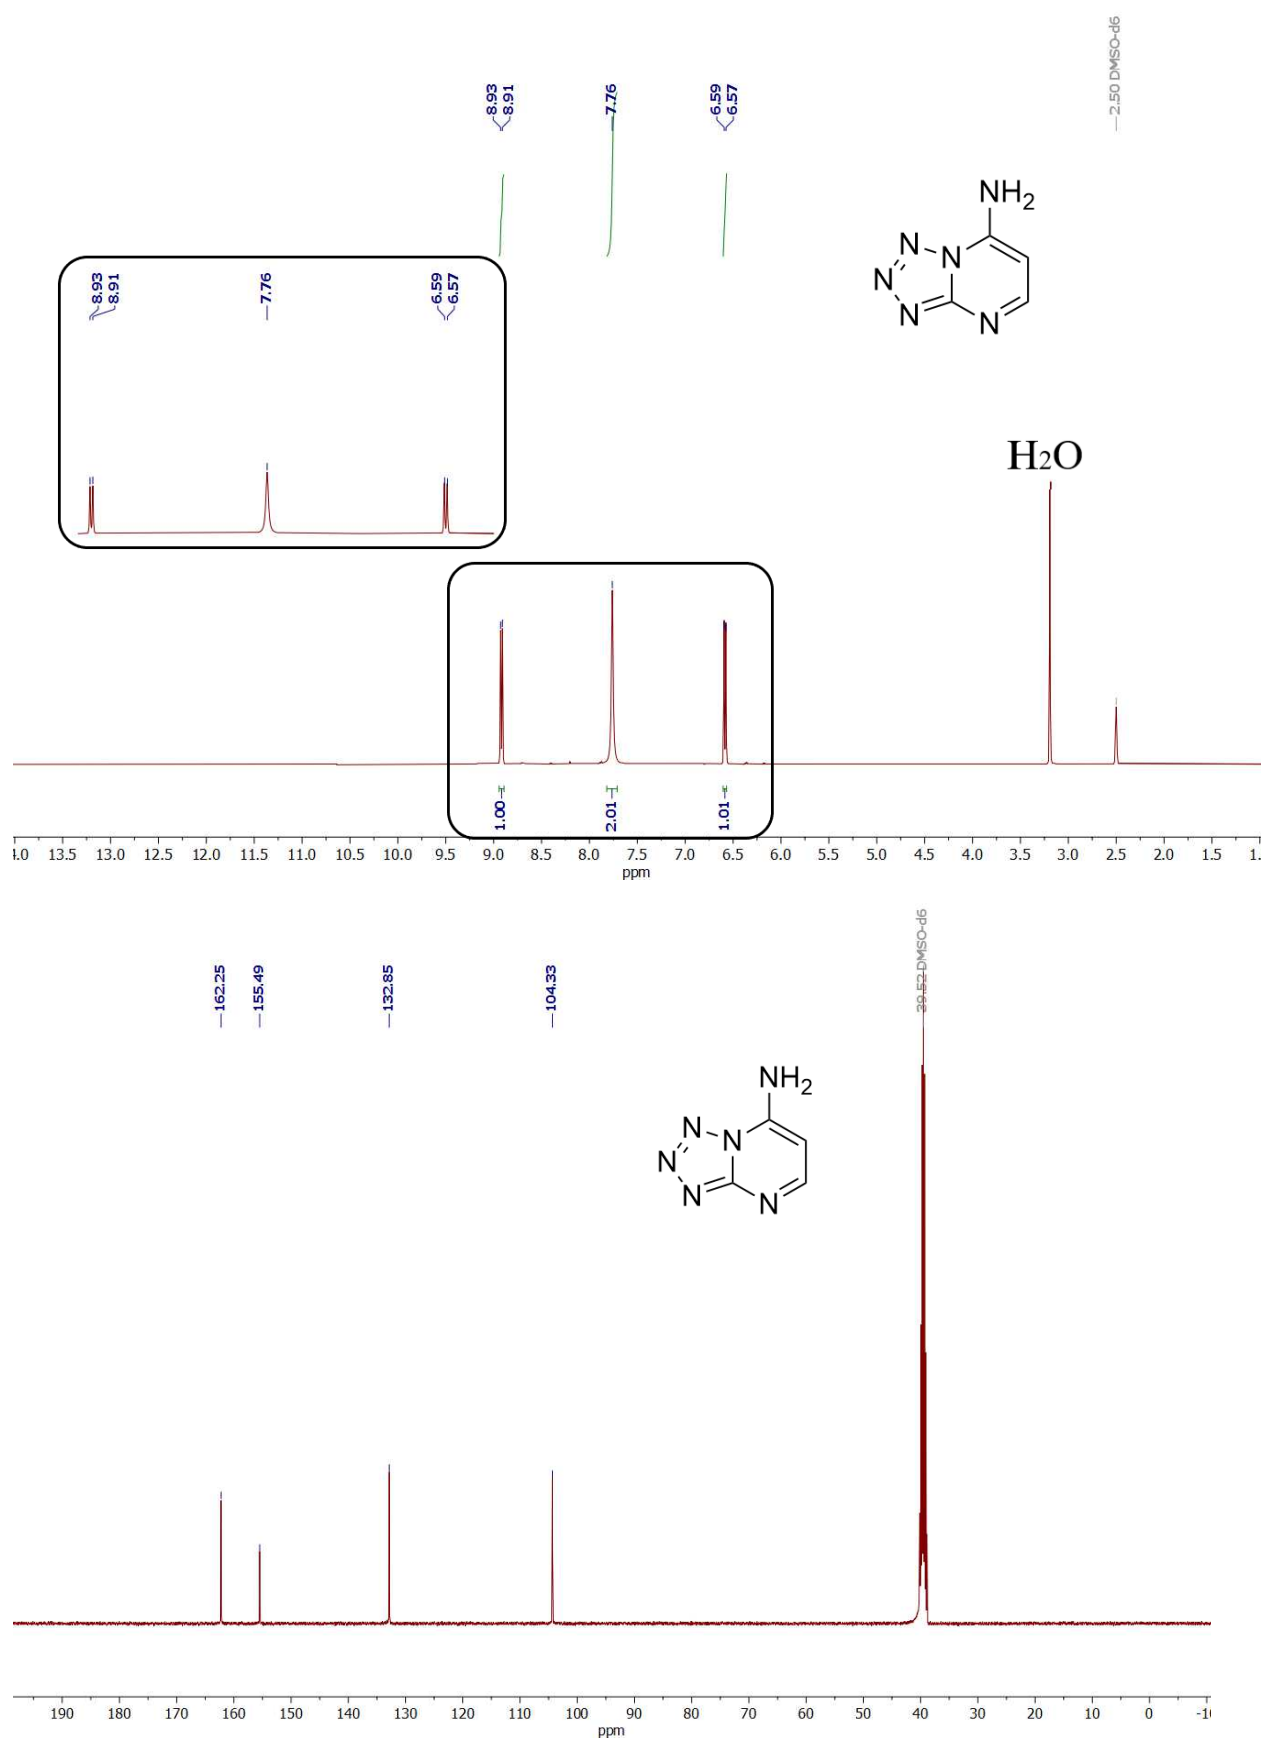

**Figure S1.**  $^1\text{H}$  NMR (400 MHz, DMSO- $d_6$ ) and  $^{13}\text{C}$  NMR (100 MHz, DMSO- $d_6$ ) spectra of tetrazolo[1,5-*a*]pyrimidin-7-amine **3**

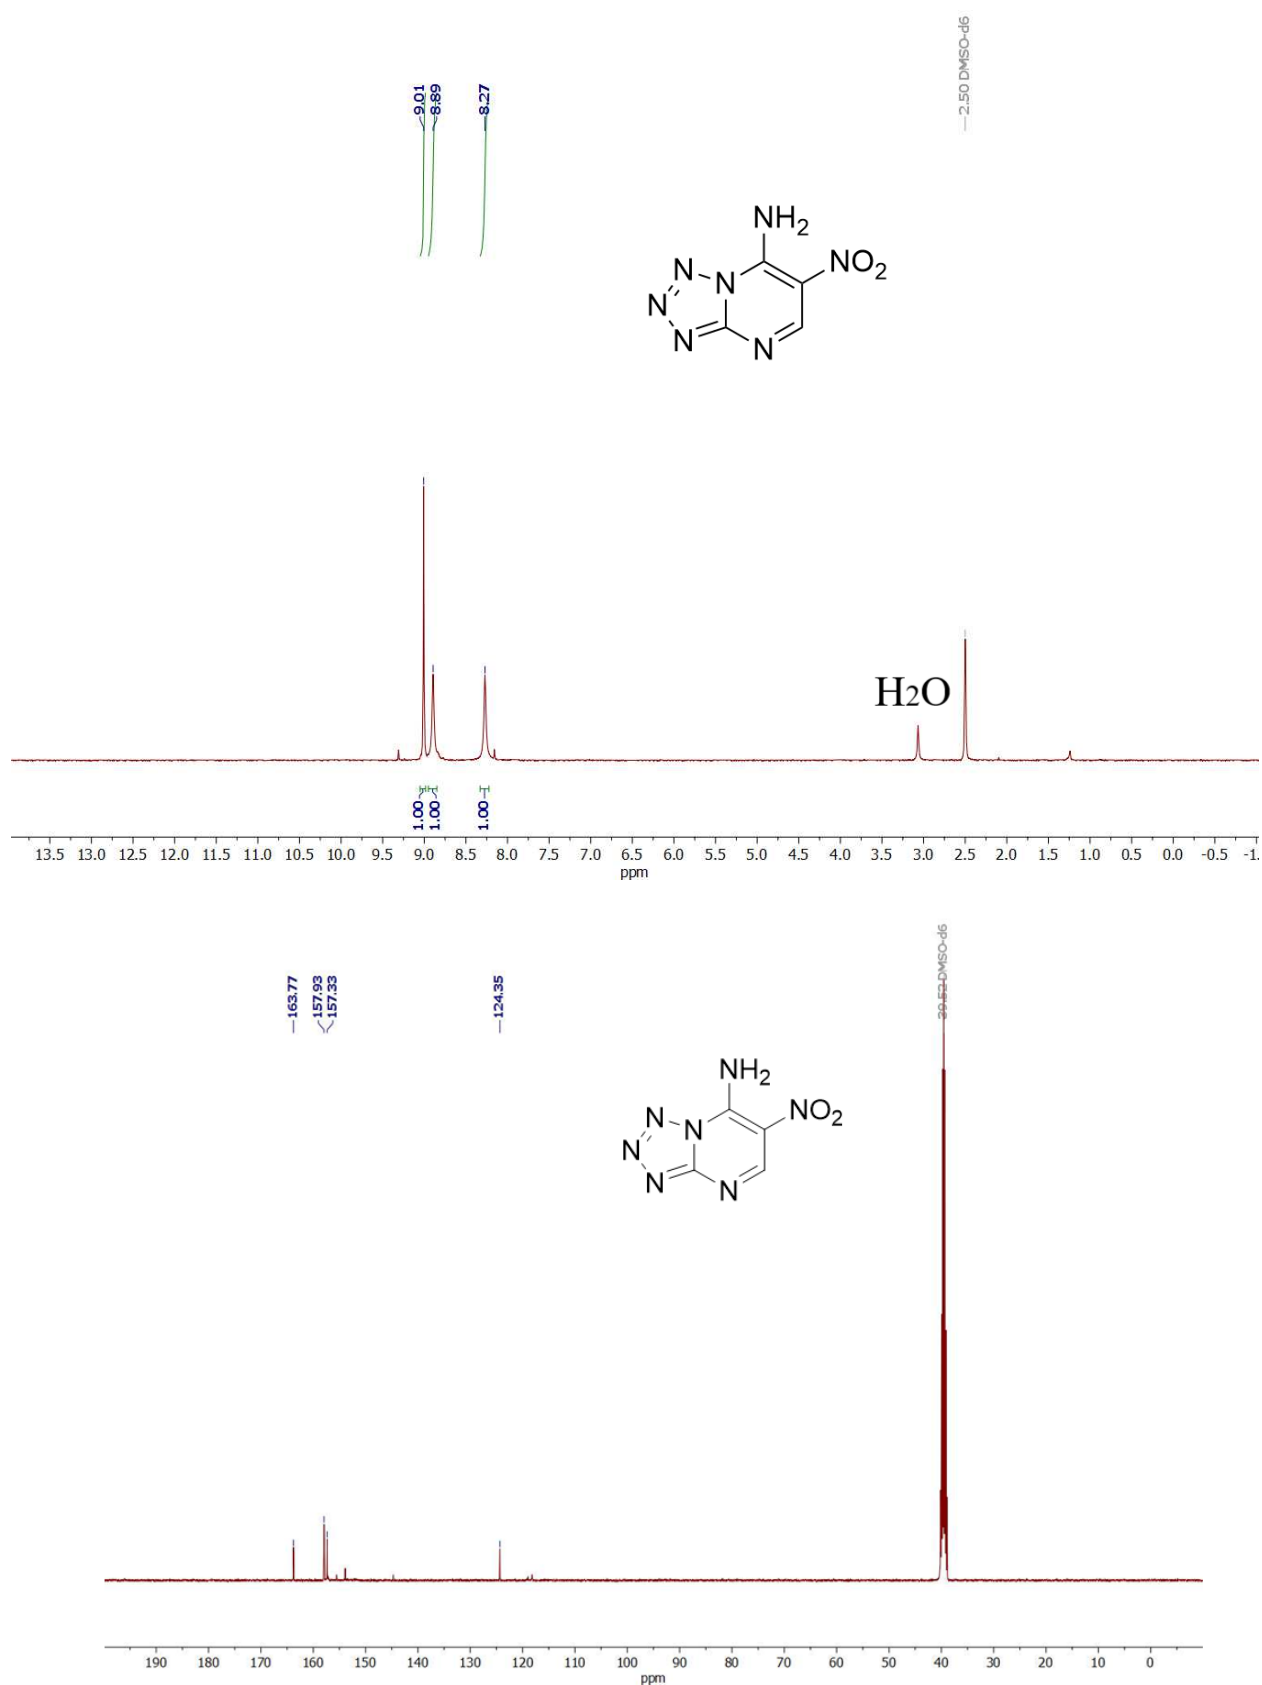

**Figure S2.** <sup>1</sup>H NMR (400 MHz, DMSO-d<sub>6</sub>) and <sup>13</sup>C NMR (100 MHz, DMSO-d<sub>6</sub>) spectra of 6-nitrotetrazolo[1,5-*a*]pyrimidin-7-amine **4**

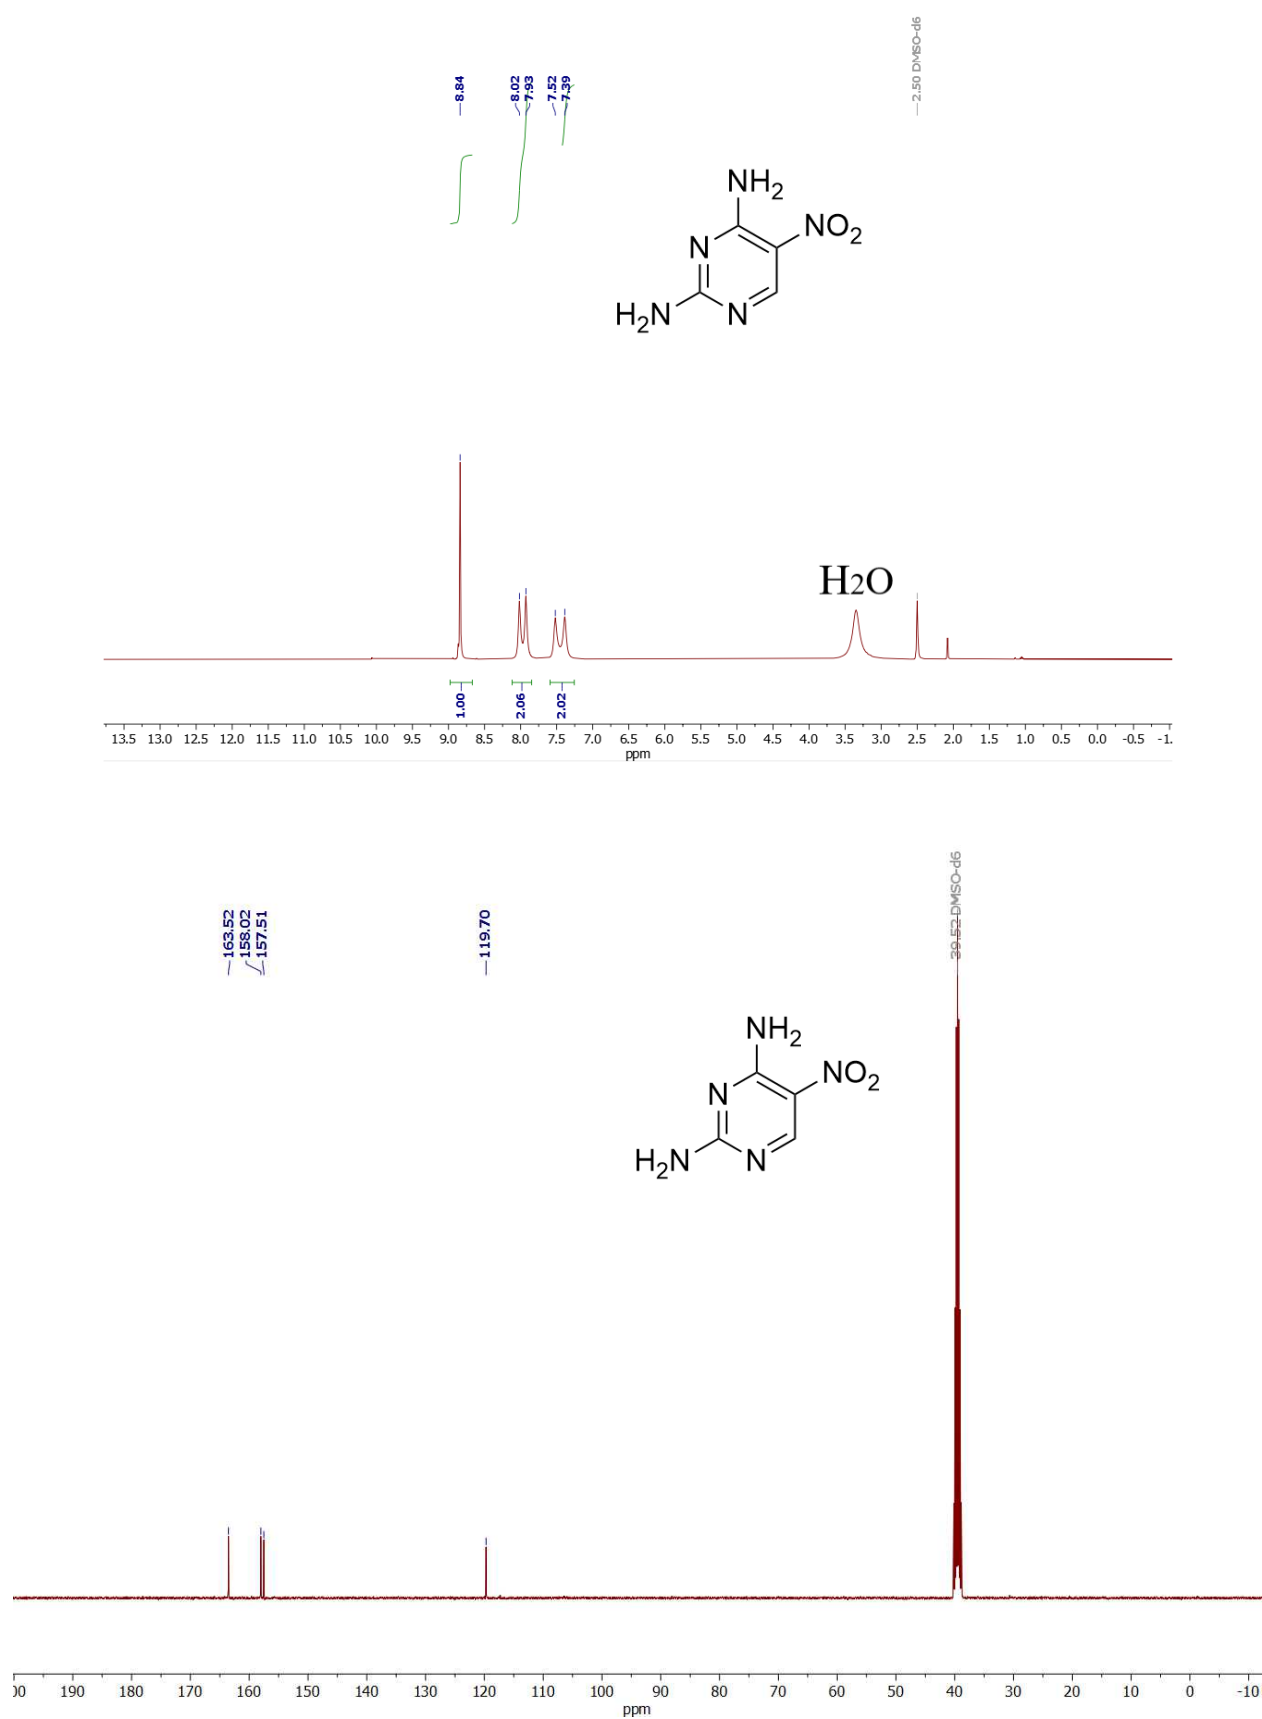

**Figure S3.**  $^1\text{H}$  NMR (400 MHz, DMSO- $d_6$ ) and  $^{13}\text{C}$  NMR (100 MHz, DMSO- $d_6$ ) spectra of **5**

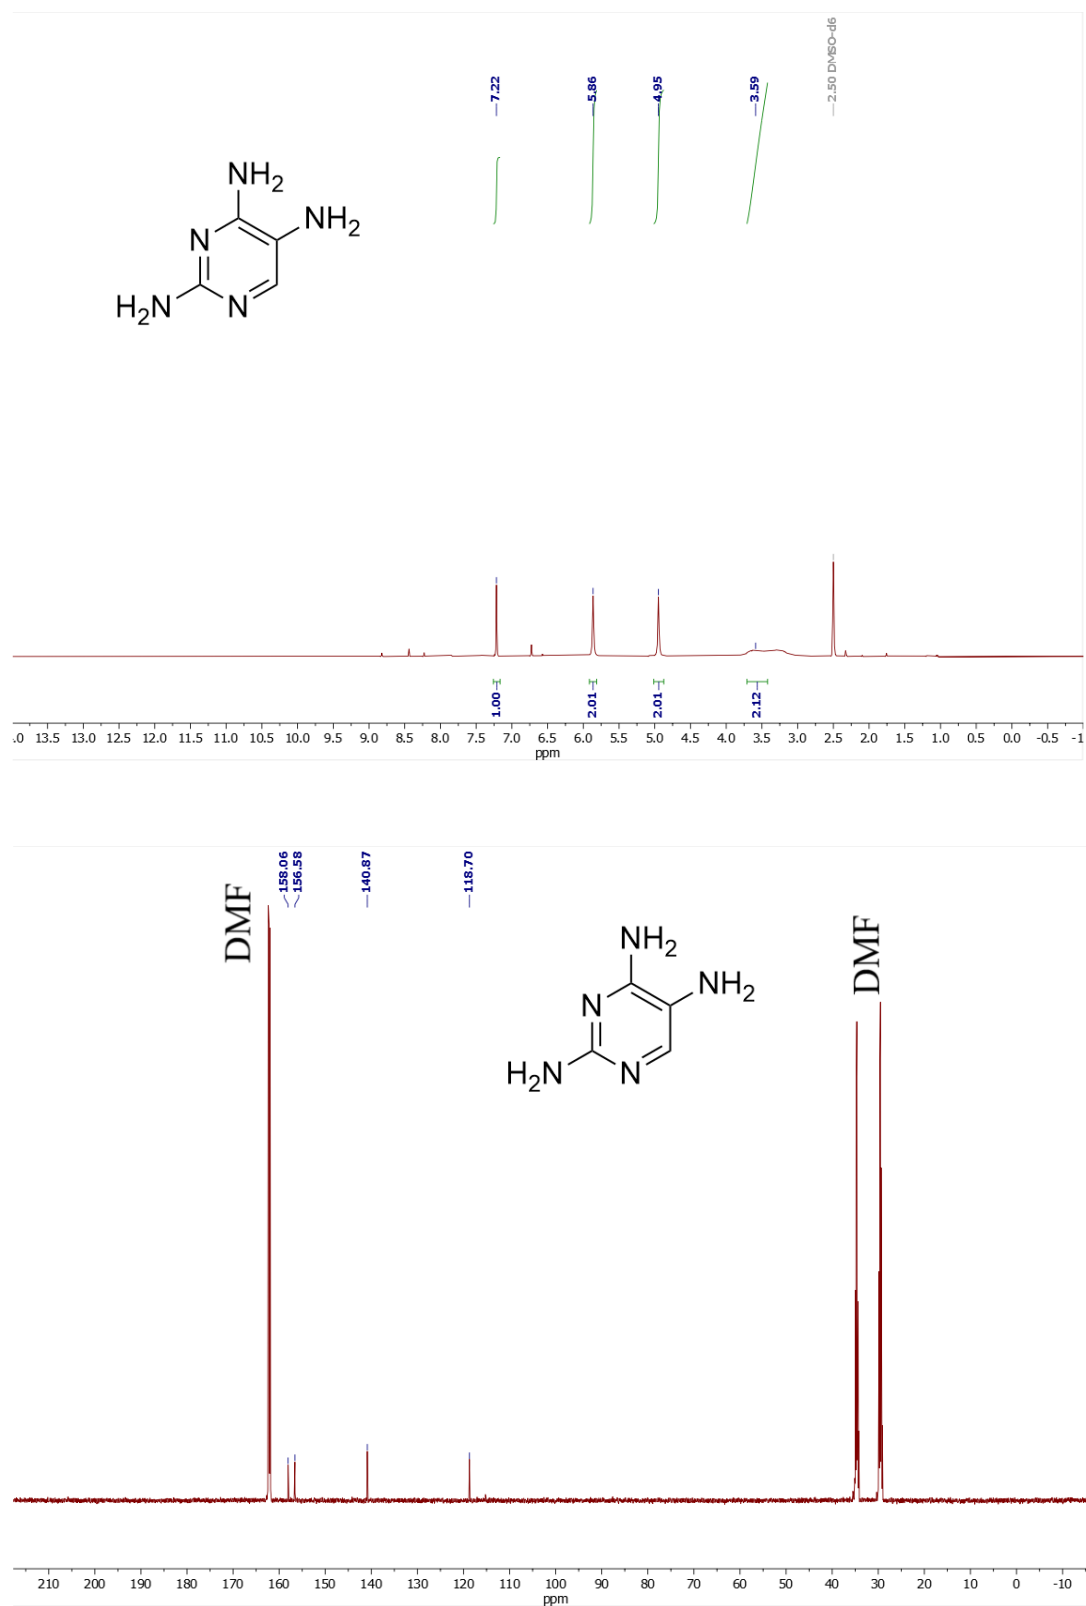

**Figure S4.** <sup>1</sup>H NMR (400 MHz, DMSO-d<sub>6</sub>) and <sup>13</sup>C NMR (151 MHz, DMF-d<sub>7</sub>) spectra of pyrimidine-2,4,5-triamine **6**

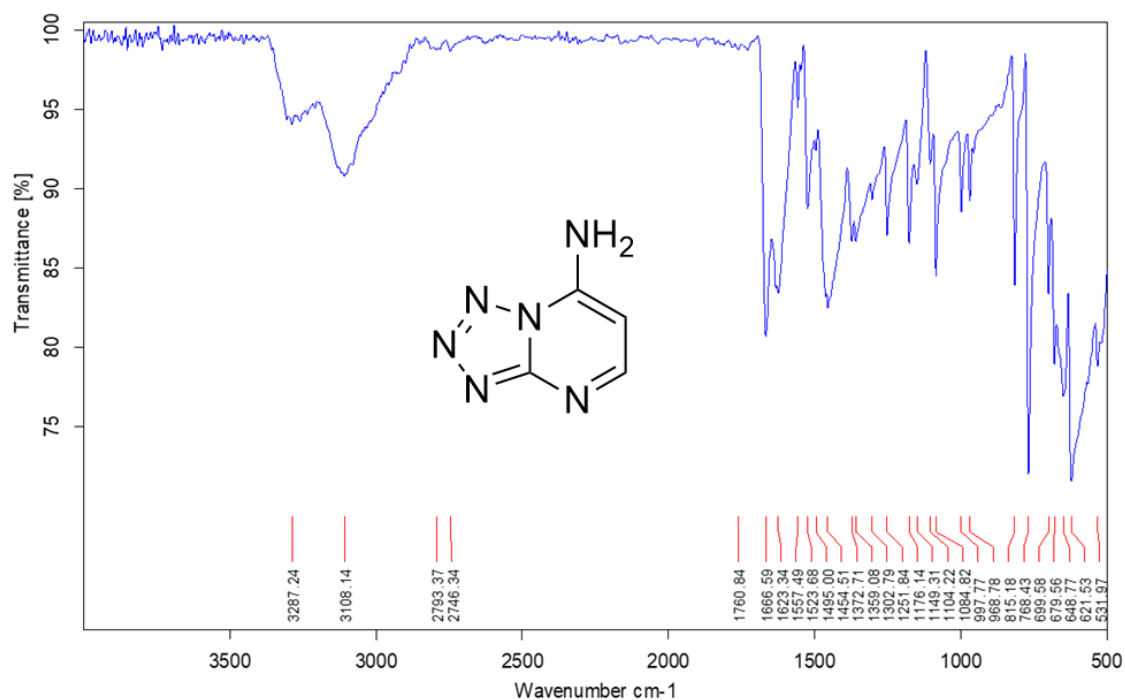

**Figure S5.** IR spectra of tetrazolo[1,5-*a*]pyrimidin-7-amine **3**

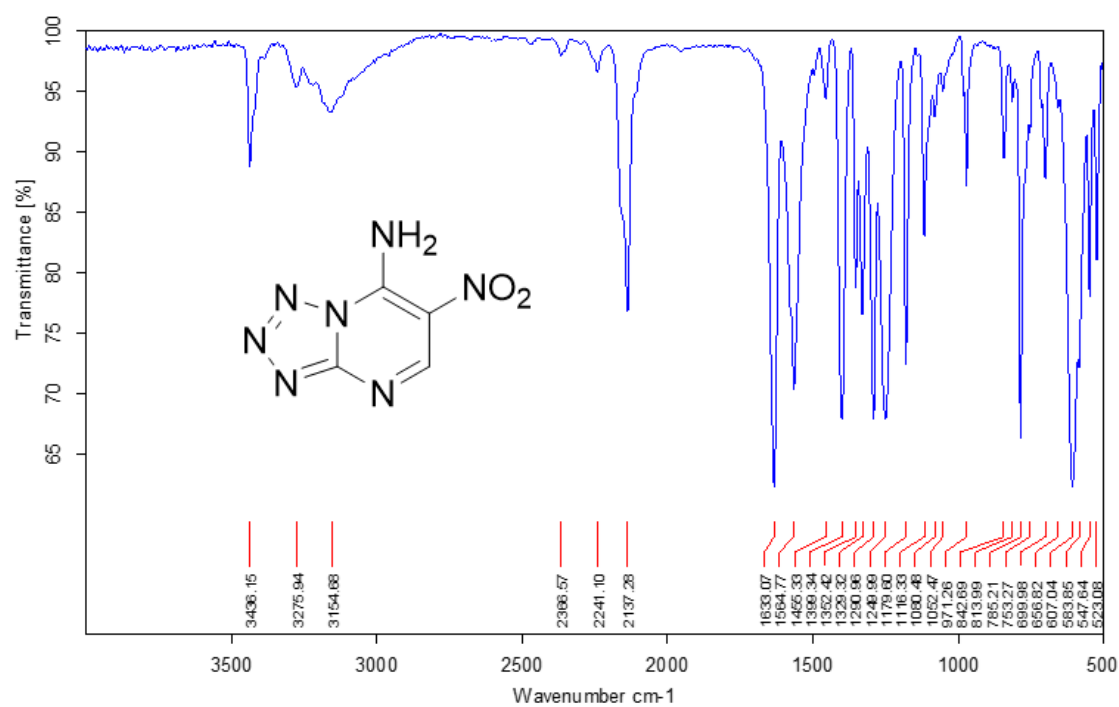

**Figure S6.** IR spectra of 6-nitrotetrazolo[1,5-*a*]pyrimidin-7-amine **4**

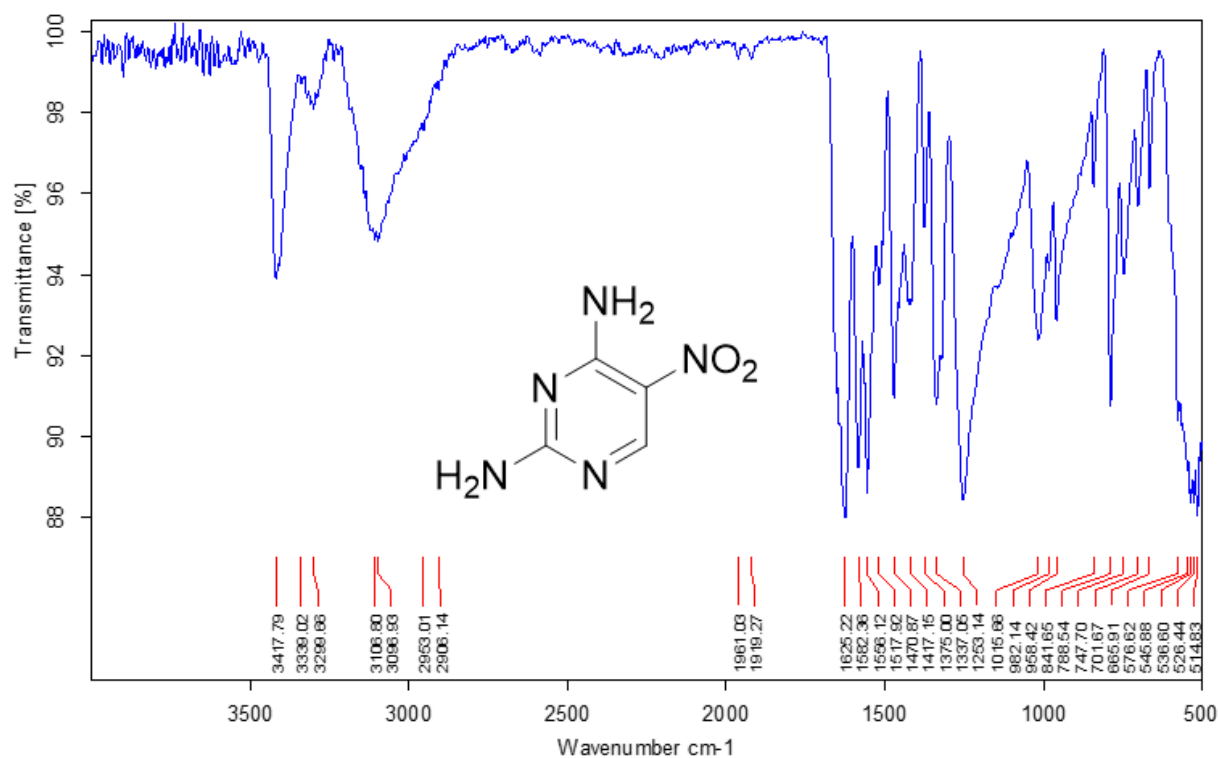**Figure S7.** IR spectra of 5-nitropyrimidine-2,4-diamine **5**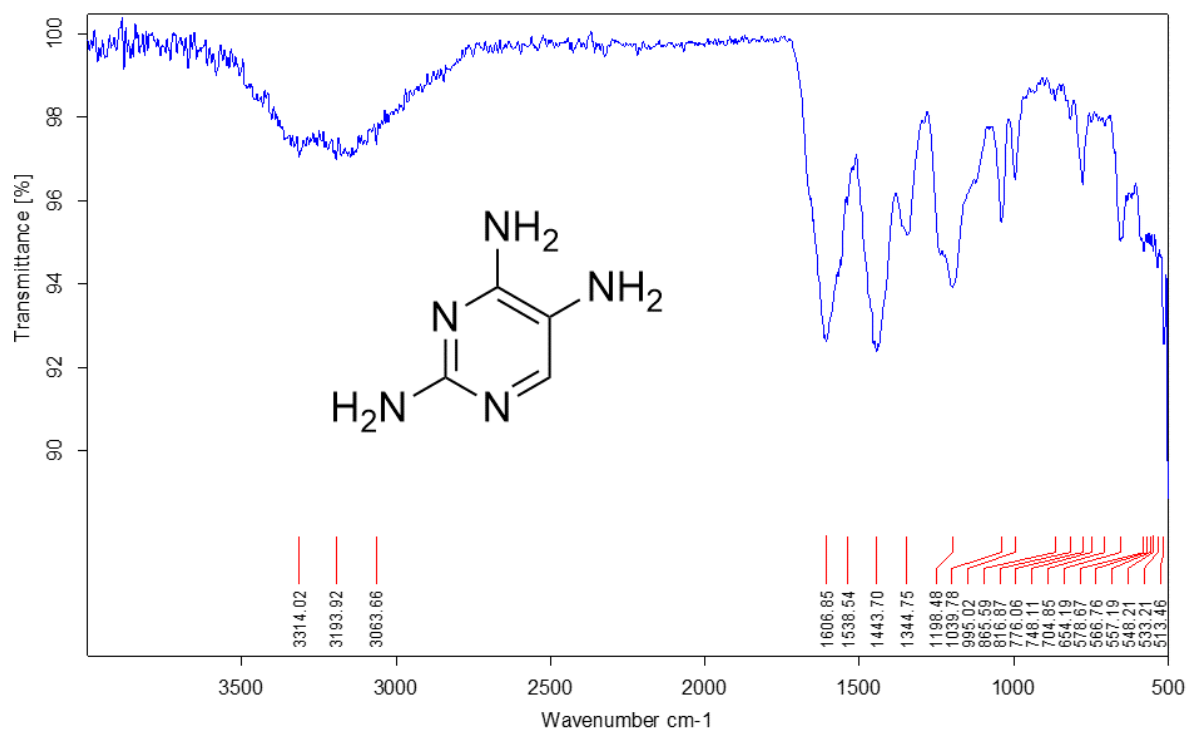**Figure S8.** IR spectra of pyrimidine-2,4,5-triamine **6**

## 2. Crystallography

**Table S1.** Hydrogen bonds with  $H\cdots A < r(A) + 2.000 \text{ \AA}$  and  $\angle DHA > 110^\circ$ .

| <b>D-H</b> | <b>d(D-H)</b> | <b>d(H..A)</b> | <b>&lt;DHA</b> | <b>d(D..A)</b> | <b>A</b>             |
|------------|---------------|----------------|----------------|----------------|----------------------|
| N1A-H1A    | 0.86(3)       | 2.26(3)        | 163(2)         | 3.093(4)       | Cl1 [2-x, 1-y, 1-z]  |
| N2A-H2AA   | 0.95(4)       | 1.87(4)        | 176(2)         | 2.814(4)       | O00H [2-x, 1-y, 1-z] |
| N2A-H2AB   | 0.85(4)       | 2.43(4)        | 159(2)         | 3.237(4)       | Cl2 [x, y+1, z-1]    |
| N4A-H4AA   | 0.95(4)       | 2.48(4)        | 146(2)         | 3.312(4)       | Cl2 [1-x, -y, 1-z]   |
| N4A-H4AA   | 0.95(4)       | 2.02(4)        | 122(2)         | 2.658(4)       | O1A                  |
| N4A-H4AB   | 0.80(4)       | 2.28(4)        | 167(2)         | 3.064(4)       | N3A [1-x, 1-y, -z]   |
| N1-H1      | 0.81(3)       | 2.38(3)        | 154(2)         | 3.129(4)       | Cl2                  |
| N1-H1      | 0.81(3)       | 2.58(3)        | 124(2)         | 3.100(4)       | O1A [1-x, -y, 1-z]   |
| N2-H2A     | 0.87(4)       | 2.33(4)        | 166(2)         | 3.176(4)       | Cl1 [x+1, y, z]      |
| N2-H2B     | 0.92(4)       | 2.38(4)        | 151(2)         | 3.212(4)       | Cl2                  |
| N4-H4A     | 0.82(3)       | 2.57(3)        | 146(2)         | 3.287(4)       | Cl1 [1-x, 1-y, 1-z]  |
| N4-H4A     | 0.82(3)       | 2.12(3)        | 125(2)         | 2.684(4)       | O1                   |
| N4-H4B     | 0.85(3)       | 2.22(3)        | 169(2)         | 3.064(4)       | N3 [2-x, 1-y, 1-z]   |
| C6-H6      | 0.930         | 2.414          | 125.3          | 3.047(4)       | O1A [1-x, -y, 1-z]   |
| C6A-H6A    | 0.930         | 2.390          | 163.4          | 3.292(4)       | O1 [x+1, y, z]       |
